1     **Effects of transhydrogenase and growth substrates on lipid D/H ratios**  
2                             **in *Desulfovibrio alaskensis* G20**

3  
4     **William D. Leavitt<sup>1,2\*</sup>, Theodore M. Flynn<sup>3</sup>, Melanie K. Suess<sup>1</sup>, Alexander S.**  
5     **Bradley<sup>1,4\*</sup>**

6     1. Department of Earth and Planetary Sciences, Washington University in St. Louis, Saint Louis, MO, USA

7     2. Department of Earth Sciences, Dartmouth College, Hanover, NH, USA

8     3. Biosciences Division, Argonne National Laboratory, Argonne, IL, USA

9     4. Division of Biology and Biomedical Sciences, Washington University in St. Louis, Saint Louis MO,  
10     USA

11     \***Correspondence:** William D. Leavitt, Department of Earth and Planetary Sciences, Washington  
12     University in St. Louis, 1 Brookings Drive, Saint Louis, MO 63130 USA  
13     wleavitt@eps.wustl.edu

14     \***Correspondence:** Alexander S. Bradley, Department of Earth and Planetary Sciences, Washington  
15     University in St. Louis, 1 Brookings Drive, Saint Louis, MO 63130 USA  
16     abradley@eps.wustl.edu

17     **Keywords:** lipid hydrogen isotopes, electron bifurcation/confurcation, biomarkers,  
18     dissimilatory sulfate reduction.

19  
20     **Abstract**

21     Microbial fatty acids preserve metabolic and environmental information in their ratios of  
22     deuterium (D) to hydrogen (H). This ratio is influenced by parameters that include the  
23     D/H of water in the microbial growth environment, and biosynthetic fractionations  
24     between water and lipid. In some microbes, this biosynthetic fractionation has been  
25     shown to vary systematically with central energy metabolism, and controls on fatty acid  
26     D/H may be linked to the intracellular production of NADPH. We examined the apparent  
27     fractionation between media water and the fatty acids produced by *Desulfovibrio*  
28     *alaskensis* G20. Growth was in batch culture with malate as an electron donor for sulfate  
29     respiration, and with pyruvate and fumarate as substrates for fermentation or sulfate  
30     respiration. A larger fractionation was observed as a consequence of respiratory or  
31     fermentative growth on pyruvate than growth on fumarate or malate. This difference  
32     correlates with opposite flows of electrons through the electron bifurcating/confurcating  
33     transhydrogenase NfnAB. When grown on malate or fumarate, mutant strains of *D.*  
34     *alaskensis* G20 containing transposon disruptions in a *nfnAB* paralog show different  
35     fractionations than the wild type strain. This isotopic phenotype is muted during  
36     fermentative growth on pyruvate, and it is absent when pyruvate is a substrate for sulfate  
37     reduction. All strains and conditions produced similar fatty acid profiles, and the D/H of  
38     individual lipids changed in concert with the mass-weighted average. We found that  
39     fractionation correlated strongly with growth rate, a pattern that has also been observed in  
40     the fractionation of sulfur isotopes during dissimilatory sulfate reduction by sulfate  
41     reducing bacteria.

42  
43

## 44 1 Introduction

45

46 The structures and isotopic compositions of lipids preserve information about organisms  
47 that can be archived in sediments and rocks over geological time scales. Understanding  
48 how to interpret this information is a central task of organic geochemistry. Lipid  
49 structures can be affiliated to particular groups of organisms (Pearson, 2014), and ratios  
50 of carbon isotopes in lipids record information about carbon sources and assimilation  
51 pathways (Hayes, 2001). The ratio of deuterium to hydrogen (D/H) in lipids derived from  
52 environmental samples has been observed to relate to the D/H in environmental water  
53 (Hayes, 2001; Sauer et al., 2001). More recently, it was shown in a range of aerobic  
54 microorganisms that the fractionation of hydrogen isotopes between media water and  
55 lipids varied with changes in growth substrate (Zhang et al., 2009). Experiments with  
56 anaerobes have shown less systematic changes in lipid D/H as a function of energy  
57 metabolism, although strong differences have been observed between pure cultures and  
58 co-cultures of the same organisms (Dawson et al., 2015; Osburn, 2013).

59

60 Observations that lipid D/H varies as a function of growth substrate in many  
61 microorganisms raises the question of what specific metabolic mechanisms are  
62 responsible. Zhang et al. (2009) considered several explanations, and through a process  
63 of elimination, deduced that observed differences in lipid D/H must be a consequence of  
64 differences in the NAD(P)H that serves as a hydride donor during lipid biosynthesis.  
65 These authors pointed out that cells have multiple pathways for producing NAD(P)H, and  
66 that the relative importance of each of these mechanisms varies with differences in  
67 growth conditions. One mechanism considered was alteration of the D/H ratio of the  
68 transferrable hydride in NAD(P)H by transhydrogenase enzymes. This suggestion stems  
69 from two key observations. First, up to half of the hydrogen atoms in microbial lipids are  
70 derived directly from NADPH during biosynthesis (Jackson, 2003; Saito et al., 1980).  
71 Second, in vitro observations of the hydrogen isotope fractionation imparted by  
72 transhydrogenase suggest that it is very large ( $> 800\%$ ) (Bizouarn et al., 1995; Jackson et  
73 al., 1999; Venning et al., 1998).

74

75 In this study, we vary substrates and use mutant strains to investigate the importance of a  
76 transhydrogenase (NADH-dependent reduced ferredoxin:NADP oxidoreductase; NfnAB)  
77 on the lipid D/H ratios in an anaerobic microorganism, *Desulfovibrio alaskensis* G20.  
78 Recent work has suggested that NfnAB plays an important role in energy conservation in  
79 this microbe (Price et al., 2014). The role of NfnAB varies as a function of the growth  
80 substrate. During growth on malate, for example, NfnAB is predicted to catalyze an  
81 electron bifurcation, in which NADPH reduces ferredoxin as well as  $\text{NAD}^+$ , with NADH  
82 as a product (Figure 1). Conversely, during growth on pyruvate, NfnAB is predicted to  
83 catalyze electron confurcation and the production of NADPH from NADH,  $\text{NADP}^+$ , and  
84 reduced ferredoxin. Since the transhydrogenase reaction catalyzed by NfnAB is predicted  
85 to be in opposite directions during growth on pyruvate versus that on malate, the lipids  
86 produced under each condition should have different D/H ratios if NfnAB is indeed a  
87 significant source of isotope fractionation for intracellular hydrogen. Furthermore, the  
88 role of NfnAB in hydrogen isotope fractionation can be further explored using mutant  
89 strains of *D. alaskensis* G20 in which the NfnAB-2 loci have been disrupted.

90

91

## 92 **2 Material and Methods**

### 93 **2.1 Strains, growth media, culture conditions and biomass sampling**

94

95 Wild type *Desulfovibrio alaskensis* G20 was obtained along with two mutant strains from  
96 the library collection at Lawrence Berkeley National Laboratory. Each mutant contains a  
97 Tn5 transposon insertion into a gene of interest. These insertions (Kuehl et al., 2014)  
98 were into the genes *nfnA-2* at locus Dde\_1250 (strain JK00256) and *nfnB-2* at locus  
99 Dde\_1251 (JK01775). Hereafter, these strains are referred to as the *nfnA-2* and *nfnB-2*  
100 mutants. These loci encode the subunits for one of two paralogs of NfnAB in *D.*  
101 *alaskensis* G20.

102

103 All strains were resuscitated from 10% glycerol freezer stocks stored at -80 °C.  
104 Resuscitated strains were inoculated into serum bottles containing approximately 50 ml  
105 of a rich lactate/sulfate medium containing yeast extract (MOY\_LS) and incubated at  
106 30 °C. After reaching stationary phase, strains were then serially transferred three times  
107 in a defined lactate/sulfate (80 mM/40 mM) medium (MO\_LS). Late-log phase cultures  
108 of the third transfer were diluted 1 to 100 into duplicate bottles for each isotope  
109 fractionation experiment. There were five experimental growth conditions, which  
110 combined an electron donor and 40 mM sulfate (for sulfate respiration), or an electron  
111 donor alone for fermentation. The five conditions were: pyruvate/sulfate respiration,  
112 malate/sulfate respiration, fumarate/sulfate respiration, pyruvate fermentation, fumarate  
113 fermentation.

114

115 The basal growth medium recipe (MO) is as follows: 8 mM magnesium chloride, 20 mM  
116 ammonium chloride, 0.6 mM calcium chloride, 6 mL/L trace elements solution (see  
117 below), 0.12 mM of FeCl<sub>2</sub> (125mM)+EDTA (250 mM) stock solution, 30 mM Tris-HCl  
118 (2M, pH 7.4 stock). Sodium thioglycolate (0.12 g/L) was added as a reductant following  
119 initial degassing. MO medium containing yeast extract (MOY) was generated by adding  
120 a final concentration of 0.1% yeast extract to MO medium from an anoxic sterile stock.  
121 Media were made anaerobic by degassing with O<sub>2</sub>-free N<sub>2</sub> that had been filtered through  
122 sterile 0.22 µm syringe filters. Solutions were degassed for 2 hours per liter. The pH of  
123 the final medium was adjusted to 7.2 using sterile and anoxic HCl or NaOH, autoclave-  
124 sterilized, and then cooled under sterile O<sub>2</sub>-free N<sub>2</sub>. After cooling, phosphate solution was  
125 added to a final concentration of 2 mM from a sterile, anoxic stock solution of  
126 K<sub>2</sub>HPO<sub>4</sub>+NaH<sub>2</sub>PO<sub>4</sub>. Thauer's Vitamins were added from a 1000x stock (Rabus et al.,  
127 2015). The initial concentration of sulfate was always 40 mM (except in fermentation  
128 experiments) and was added directly to the medium from a sterile and anoxic stock  
129 solution of Na<sub>2</sub>SO<sub>4</sub> solution. Electron donors (sodium lactate, sodium pyruvate, malic  
130 acid, or sodium fumarate) were prepared separately as 1M stocks in MilliQ water,  
131 adjusted to a pH of 7.2, and degassed in a manner similar to the basal media. These  
132 anoxic stocks were then added to the basal media using aseptic technique.

133

134 Growth rate was determined by monitoring changes in optical density (OD<sub>600</sub>) over time  
135 for each experiment. Replicate cultures were tracked through log-phase and into early

136 stationary phase, at which point they were harvested for biomass. Growth rate was  
137 calculated using a modified logistic equation (Rabus et al., 2006) and averaged across the  
138 apparent log-phase of growth. For experiments showing clear diauxic growth we  
139 calculated an interval-weighted average growth rate to account for both phases.

140

141 Duplicate 50mL cultures were harvested at the onset of early stationary phase by opening  
142 the serum bottles, decanting the remainder of each serum bottle (> 40mL) into sterile  
143 50mL conical tubes, and centrifuging at 5000 rpm at 5 °C for 30 minutes. Spent medium  
144 was decanted into a fresh 50mL tube and frozen at -80 °C for later analysis of the isotopic  
145 composition of water therein. The biomass pellet was frozen at -80 °C, transferred to a  
146 pre-combusted 4mL borosilicate glass vial, lyophilized, and weighed.

147

## 148 **2.2 Fatty acid extraction and quantitation**

149

150 Samples were simultaneously extracted and derivatized to fatty acid methyl ethers  
151 (FAMES) by adding a mixture of hexane, methanol and acetyl chloride to the lyophilized  
152 cell pellet, followed by heating at 100 °C for 10 minutes, and extraction with hexane  
153 (Rodriguez-Ruiz et al., 1998; Zhang et al., 2009). This procedure was also concurrently  
154 performed on two isotope standards, myristic acid and phthalic acid, for which the  $\delta D$  of  
155 non-exchangeable hydrogen was known (Qi and Coplen, 2011). Each sample was reacted  
156 with acid-activated copper to remove reduced sulfur compounds, and then concentrated  
157 under a stream of dry hydrocarbon-free nitrogen.

158

159 Individual FAMES were analyzed using a HP 7890 gas chromatograph fitted with a  
160 split/splitless injector operated in splitless mode, equipped with a J&W DB-5 fused silica  
161 capillary column (30 m length, 0.25-mm inner diameter, and 0.25- $\mu$ m film thickness) and  
162 coupled to an Agilent 6973 mass selective detector. FAME identifications were based on  
163 mass spectra and retention times. Quantities were determined by peak area as calculated  
164 in Chemstation (Agilent Technologies, Santa Clara, CA) relative to a known amount of  
165 co-injected methyl tetracosanoate (C24:0) provided by Dr. A. Schimmelmann (Indiana  
166 University).

167

## 168 **2.3 Isotopic measurements and data handling**

169

170 Hydrogen-isotopic compositions of individual FAMES were determined using a TraceGC  
171 gas chromatograph fitted with a column identical to that on the Agilent GC, and coupled  
172 to a Thermo Scientific Delta V Plus isotope-ratio-monitoring mass spectrometer via a  
173 Thermo GC-Isolink pyrolysis interface at 1400 °C. Column temperature was initially  
174 60 °C and was increased at a rate of 6 °C min<sup>-1</sup> until reaching a final temperature of  
175 320 °C. Hydrogen isotope ratios of individual lipids were determined relative to  
176 coinjected methyl tetracosanoate (C24:0) of known isotopic composition, provided by Dr.  
177 Schimmelmann (Indiana University). Instrumental precision was regularly monitored by  
178 analyzing RMS error on mixtures of FAMES and of *n*-alkanes of known isotopic  
179 composition, also purchased from Dr. Schimmelmann (Indiana University). Over the  
180 measurement period the mean RMS error on a mixture of 8 FAMES was 5.5‰ (n = 286).  
181 Samples were discarded if they were not bracketed by injections of FAMES mixture with

182 an RMS better than 7%. H<sub>3</sub> factors were determined daily and had a mean value of 2.98  
183 ± 0.3 ppm/nA. All FAME isotopic compositions were corrected by mass balance for the  
184 hydrogen present in the methyl group, calculate from them myristic acid and phthalic  
185 acid isotopic standards. Samples were reinjected (pseudoreplicates) three to six times,  
186 and errors were propagated following established methods (Polissar and D'Andrea,  
187 2014). Statistical analyses were performed in either Prism (GraphPad Software, Inc., La  
188 Jolla, CA) or R (RCoreTeam, 2015).

189

190 All D/H ratios are reported as δD values relative to V-SMOW, and fractionations are  
191 reported as apparent fractionations between media water and lipid by the equation

192

$$\epsilon_{lipid} = 1000 \left( \frac{1000 + \delta D_{lipid}}{1000 + \delta D_{water}} - 1 \right)$$

193

194 The δD<sub>water</sub> of growth media water was measured using a Picarro L2130-*i* cavity ring-  
195 down spectrometer at Northwestern University.

196

## 197 **2.4 Comparative analysis of *nfnAB* sequences**

198

199 We constructed a gene tree of *nfnAB* sequences by retrieving data from two public  
200 repositories of annotated genomes: the SEED database (Overbeek et al., 2014) and  
201 UniProt (The UniProt Consortium, 2014). Sequences that were homologous to *nfnAB*  
202 from *D. alaskensis* G20 were identified using an amino acid BLAST search. This  
203 approach identified 1,575 putative *nfnAB* sequences from sequenced genomes. For this  
204 study, this list was manually refined to include only known sulfate reducers,  
205 methanogens, and other anaerobes. The 104 retained *nfnAB* sequences were closely  
206 related to that of *D. alaskensis* G20 using established criteria (Marti-Renom et al., 2000),  
207 with > 40% amino acid identity and BLASTP percent identities ranging from 45–77%. *D.*  
208 *alaskensis* G20 has two copies of the *nfnAB* gene that share 85% amino acid identity. A  
209 multiple sequence alignment of the 104 *nfnAB* sequences was created using MUSCLE  
210 (Edgar, 2004) and checked manually using AliView (Larsson, 2014). Alignments in  
211 FASTA format are available to download in the Supplementary Materials. Pairwise  
212 distances for construction of a phylogenetic tree were calculated using the RAxML  
213 maximum likelihood algorithm (Stamatakis, 2006) with the program raxmlGUI (Silvestro  
214 and Michalak, 2012). The tree itself was generated using the Interactive Tree of Life  
215 software (Letunic and Bork, 2011).

216

217

## 218 **3. Results**

### 219 **3.1 Growth rates**

220

221 Growth experiments revealed distinct physiological and isotopic phenotypes among the  
222 wild type and mutant strains of *D. alaskensis* G20. Growth rates are reported in Table 1  
223 and growth curves are plotted in Figure 2. Some conditions exhibited diauxic growth; we  
224 report the average growth rate through both phases.

225

226 Some growth conditions showed clear phenotypic differences between the *D. alaskensis*  
227 G20 wild type and the two *nfnAB-2* mutants. Each strain was able to grow as a sulfate  
228 reducer using malate as an electron donor, but the growth rate of the mutants was only  
229 22% that of the wild type. Similarly, with fumarate as an electron donor coupled to  
230 sulfate reduction, mutant growth rate was roughly 10% that of the wild type. A repression  
231 in growth rate (22% of wild type) was also apparent when the strains were grown as  
232 fumarate fermenters, in the absence of sulfate. Under all of these conditions, the final  
233 optical density of the mutant cultures was less than that of the wild type (Figure 2). The  
234 mutant strains exhibited diauxic growth under each of these growth conditions whereas  
235 the wild type did not (Figure 2).

236

### 237 3.2 Lipid profiles

238

239 We quantified the abundance of fatty acid structures in each of the three strains under all  
240 five experimental conditions (i.e. pyruvate/sulfate, malate/sulfate, fumarate/sulfate,  
241 fumarate fermentation, or pyruvate fermentation). Fatty acids ranged in carbon number  
242 from 14 to 18, and both saturated and monounsaturated fatty acids were present.  
243 Branched-chain fatty acids of the iso and anteiso series are present in all three strains  
244 under all five experimental conditions. Branched fatty acids contained a total of 15 to 18  
245 carbons.

246

247 Differences in the lipid profiles of the mutant relative to the wild type were apparent only  
248 under the three conditions in which the mutant showed a growth defect: malate/sulfate,  
249 fumarate/sulfate, and fumarate fermentation (Figures 3B, 3C, 3D). During growth on  
250 malate/sulfate, the *nfnAB-2* mutant strains contain a higher proportion of anteiso-C17:0,  
251 and a lower proportion of C16:0, C18:0, and iso-C15:0 fatty acids. A similar pattern is  
252 seen in the mutants during growth on fumarate/sulfate and during fumarate fermentation,  
253 although the C18 patterns are slightly different. Differences in anteiso-C17:0 fatty acid is  
254 most pronounced in these three growth conditions. In contrast, during both respiratory  
255 and fermentative growth on pyruvate, the fatty acid profile of the wild type and mutants  
256 were nearly identical (Figures 3A, 3E). Across all strains and conditions, there is a weak  
257 inverse correlation between the proportion of branched fatty acids and mass weighted  
258 fractionation (Figure S1). Data used to generate these plots are deposited in a permanent  
259 repository at Figshare: doi:10.6084/m9.figshare.2132731.

260 [Please see temporary link below. The above link is inactive until this MS is accepted,  
261 and is permanent and non-editable once activated. The following link is active during  
262 review and hosts all SOM files: <https://figshare.com/s/08e9f7b9a5e2e592640f>].

263

### 264 3.3 Lipid D/H fractionations

265

266 We calculated  $\delta D_{\text{total}}$  as the weighted average of the  $\delta D_{\text{lipid}}$  of each individual fatty acid  
267 pool produced in each strain. We then calculated (Sessions and Hayes, 2005) a total  
268 apparent fractionation ( $\epsilon_{\text{total}}$ ) for the fatty acid pool. The results are shown in Figure 4.  
269 Apparent fractionations produced by the wild type strain were not discernable between  
270 pyruvate/sulfate respiration ( $\epsilon_{\text{total}} = -171\text{‰}$ ) and pyruvate fermentation ( $\epsilon_{\text{total}} = -168\text{‰}$ ).  
271 Similarly, both *nfn* mutants have  $\epsilon_{\text{total}} = -171\text{‰}$  when grown by pyruvate/sulfate

272 respiration. However, *nfn* mutants that grew by fermenting pyruvate had smaller  
273 fractionations ( $\epsilon_{\text{total}} = -160\text{‰}$  for the *nfnA-2* mutant and  $\epsilon_{\text{total}} = -162\text{‰}$  for the *nfnB-2*  
274 mutant).

275  
276 Differences in  $\epsilon_{\text{total}}$  were more pronounced in the other growth conditions. In comparison  
277 to growth on pyruvate, the wild type strain showed smaller  $\epsilon_{\text{total}}$  as a consequence of  
278 malate/sulfate growth ( $\epsilon_{\text{total}} = -143\text{‰}$ ), fumarate/sulfate growth ( $\epsilon_{\text{total}} = -135\text{‰}$ ), and  
279 fumarate fermentation ( $\epsilon_{\text{total}} = -142\text{‰}$ ). The *nfn* mutants showed even stronger isotopic  
280 phenotypes. The *nfnA-2* mutant had smaller  $\epsilon_{\text{total}}$  than the wild type during growth on  
281 malate/sulfate ( $\epsilon_{\text{total}} = -82\text{‰}$ ), fumarate/sulfate ( $\epsilon_{\text{total}} = -103\text{‰}$ ), and fumarate ( $\epsilon_{\text{total}} = -$   
282  $108\text{‰}$ ). The *nfnB-2* showed consistently smaller fractionations than both the wild type  
283 and the *nfnA-2* mutant on malate/sulfate ( $\epsilon_{\text{total}} = -59\text{‰}$ ), fumarate/sulfate ( $\epsilon_{\text{total}} = -72\text{‰}$ ),  
284 and fumarate ( $\epsilon_{\text{total}} = -72\text{‰}$ ).

285  
286 The  $\delta D_{\text{lipid}}$  of individual lipids can help explain some of these patterns. Most lipids from  
287 our cultures were depleted in deuterium by between  $-50\text{‰}$  and  $-250\text{‰}$  relative to the  
288 water in the growth medium. Figures 5 and S2 summarize the results from each strain.  
289 The various lipid structures produced by each strain had a wide range of  $\epsilon_{\text{lipid}}$ , but isotopic  
290 ordering among lipids was remarkably consistent. Figure 5A shows  $\epsilon_{\text{lipid}}$  values for the  
291 most abundant lipids in each combination of strain and culture conditions. For all three  
292 strains, across nearly every culture condition, the fatty acid with the largest  $\epsilon_{\text{lipid}}$  was  
293 C16:0. The only exception to this were the pyruvate fermentation experiments, in which  
294 the largest  $\epsilon_{\text{lipid}}$  observed was in anteiso-C17:1 in all three strains, and in the fumarate  
295 fermentation by the mutants, where the C16:0 was too low in abundance to make isotopic  
296 measurements (Figure 5A). The lipid with the smallest  $\epsilon_{\text{lipid}}$  was uniformly iso-C18:0, and  
297 was in some cases enriched relative to media water (Figure 5A).

298  
299 This suggests that the variations in  $\epsilon_{\text{total}}$  were mainly a function of a systematic change in  
300  $\epsilon$  from one condition to another. Changes in the relative proportion of individual lipids  
301 that are particularly enriched or depleted in deuterium. Figure 5B shows the deviation of  
302  $\epsilon_{\text{lipid}}$  for each individual lipid relative to the  $\epsilon_{\text{total}}$  for that strain and culture condition. With  
303 few exceptions, a consistent pattern emerged in the relative fractionation of each lipid  
304 relative to the weighted average. Together, Figures 4 and 5 indicate the presence of  
305 significant differences between the wildtype and mutants for growth on malate/sulfate,  
306 fumarate/sulfate or fumarate fermentation, while little to no difference existed between  
307 strains grown on pyruvate/sulfate or pyruvate fermentation.

308  
309 We examined whether changes in the abundance of particular lipids were correlated with  
310 each other, with growth rate, or with  $\epsilon_{\text{total}}$ . A graphical display of Pearson correlation  
311 indices for each variable pair is shown in Figure 6. This indicates that  $\epsilon_{\text{total}}$  is strongly  
312 correlated with the relative abundance anteiso-C17 fatty acid, and negatively correlated  
313 with C16 and C16:1 fatty acid. However, the relative abundance of each of these fatty  
314 acids was strongly correlated (negatively, for anteiso-C17 fatty acid) with average growth  
315 rate ( $\mu$ ). Growth rate emerged as a strong correlate of  $\epsilon_{\text{total}}$ . This correlation is shown in  
316 Figure 7.

317

318

## 319 4. Discussion

### 320 4.1 Hydrogen isotopes and intracellular electron flow

321

322 This study aims at improving understanding of the specific cellular mechanisms that  
323 contribute to the D/H ratios in lipids. Zhang et al. (2009) suggested that mechanisms  
324 related to the purine dinucleotide coenzymes NAD(P)H were likely to be central to  
325 determining lipid  $\delta D$ . In particular, that work suggested that H-isotopic fractionation by  
326 transhydrogenase was one potential mechanism for changing the H-isotopic composition  
327 the transferable hydride on NAD(P)H. NAD(P)H directly provides approximately 50% of  
328 lipid hydrogen, and changes in  $\delta D$  of NAD(P) or the ratios of its oxidized to reduced  
329 forms in cells could be effective mechanisms for impacting  $\delta D_{\text{lipid}}$ .

330

331 Previous work on hydrogen isotope fractionation in sulfate reducing bacteria (SRB)  
332 includes studies of pure cultures of *Desulfobacterium autotrophicum* (Campbell et al.,  
333 2009; Osburn, 2013), *Desulfobacter hydrogenophilus* (Osburn, 2013) and of  
334 *Desulfococcus multivorans* in pure culture and in co-culture with a methanogen (Dawson  
335 et al., 2015). Results contrast with those obtained from aerobes, in which growth on  
336 different carbon sources results in a large range of  $\epsilon_{\text{total}}$  (Zhang et al., 2009). *D.*  
337 *autotrophicum* shows only a small range in  $\epsilon_{\text{total}}$  during heterotrophic growth on acetate,  
338 succinate, pyruvate, glucose, or formate, or during autotrophic growth on  $H_2/CO_2$ , yet  
339 there are large differences in the  $\epsilon_{\text{lipid}}$  of individual fatty acids (Campbell et al., 2009;  
340 Osburn, 2013). Similarly *D. hydrogenophilus* and *D. multivorans* grown in pure cultures  
341 have only a small range of  $\epsilon_{\text{total}}$  during heterotrophic growth (Dawson et al., 2015;  
342 Osburn, 2013), with a particularly muted range of  $\epsilon_{\text{total}}$  during growth of *D. multivorans*  
343 in co-culture.

344

345 In sulfate reducing bacteria, transhydrogenase NfnAB plays an important role in energy  
346 metabolism (Pereira et al., 2011; Price et al., 2014). If this transhydrogenase strongly  
347 impacts hydrogen isotope fractionation, it might play a large role in the  $\delta D$  observed in  
348 lipids, including any variations in  $\delta D$  as a function of substrate. In this model, NAD(P)H  
349 is produced or consumed by a variety of metabolic reactions in the cell, but cycling of  
350 NAD(P)H through NfnAB could play a dominant role in determining the  $\delta D$  of  
351 NAD(P)H. In addition,  $\delta D_{\text{lipid}}$  might be closely coupled to the size of the pools of  
352 oxidized and reduced purine dinucleotide coenzymes, rather than simply a function of  
353 changes in NAD(P)H  $\delta D$ . The perturbation of NfnAB in mutant strains would be  
354 expected to affect the relative sizes of these pools, and could help explain the observed  
355 patterns in lipids.

356

357 If NfnAB is important in determining  $\delta D_{\text{lipid}}$  in SRB, it could also be significant in other  
358 anaerobes as well. NfnAB genes are widely distributed in anaerobes, particularly in  
359 Deltaproteobacteria, Thermotogae, Clostridia, and methanogenic archaea (Buckel and  
360 Thauer, 2013), and nearly ubiquitous in sulfate-reducing bacteria (Pereira et al., 2011).  
361 Figure 8 shows the relationship of NfnAB sequences from a range of anaerobes. While  
362 *nfnAB* sequences tend to cluster phylogenetically, the gene tree shown in Figure 8  
363 identifies potential lateral gene transfer events among the SRB. The NfnAB genes from



364 *Desulfobulbus propionicus* and *Syntrophobacter fumaroxidans* are more similar to those  
365 of the methanogenic archaea rather than the other SRB in the Deltaproteobacteria  
366 (including *D. alaskensis* G20), which cluster together. Similar to *D. alaskensis* G20, *D.*  
367 *propionicus* and *S. fumaroxidans* are SRB that are capable of fermentative growth on  
368 compounds such pyruvate (both) and fumarate (*S. fumaroxidans*).

369  
370 Other electron bifurcating hydrogenases of note include the multisubunit  
371 [FeFe]hydrogenase from *Thermotoga maritima* (HydABC) and from acetogenic bacteria,  
372 the [NiFe]hydrogenase/heterodisulfide reductase (MvhADG–HdrABC) from  
373 methanogenic archaea (Buckel and Thauer, 2013; Wang et al., 2013a, 2013b). Two other  
374 families of transhydrogenases are common in aerobes, including the proton-translocating  
375 transhydrogenase PntAB, and the energy-independent transhydrogenase UdhA (Sauer et  
376 al., 2004).

377  
378 In *D. alaskensis* G20, the catalytic role of NfnAB seems to correlate with  $\delta D_{lipid}$ . During  
379 growth on pyruvate/sulfate, electrons are predicted to flow from pyruvate to ferredoxin.  
380 Price et al. (2014) suggest that the electrons from ferredoxin flow through NfnAB to  
381 produce reduced NADPH. That study pointed out that this transhydrogenase reaction is  
382 probably required to produce sufficient NADPH for biosynthesis, although the  
383 experiments were done in the presence of yeast extract, which minimized the importance  
384 of this reaction. In contrast, our isotopic experiments used a defined medium lacking  
385 yeast extract, so the importance of this reaction would not be minimized. NfnAB might  
386 be essential to producing sufficient NADPH for biosynthetic reactions. For both the wild  
387 type and mutant, growth on pyruvate/sulfate produced lipids that uniformly had the  
388 largest  $\epsilon_{total}$  across all four experiments.

389  
390 Sulfate reduction using malate results in NfnAB catalyzing an electron bifurcation in  
391 which NADPH reduces  $NAD^+$  and ferredoxin (Price et al., 2014). Fumarate respiration  
392 operates in a manner similar to malate. These two substrates can be interconverted by  
393 fumarase (Price et al., 2014), so this similarity is likely to be related to similar growth and  
394 electron flow. Growth on each of these substrates produces similar patterns in hydrogen  
395 isotope fractionation. In each case, the wild type strain produces lipids with  $\epsilon_{total}$   
396 near -140‰, which is not as depleted in deuterium as lipids produced during growth on  
397 pyruvate. In contrast to growth on pyruvate, the mutant strains have substantially smaller  
398  $\epsilon_{total}$ . One explanation for this difference is that the mutation of one paralog of NfnAB in  
399 this strain changed the ratio of reduced to oxidized dinucleotides in the cell, with a higher  
400 ratio of NADPH to  $NADP^+$  and a lower ratio of NADH to  $NAD^+$ . A second possibility is  
401 that the change in  $\epsilon_{total}$  is a consequence of the growth defect of the mutant strains.

402  
403 Previous work has investigated the relationship of growth rate to  $\epsilon_{total}$ . Zhang et al. (2009)  
404 did not observe a systematic relationship in the aerobic organisms that they studied.  
405 However, a negative relationship was observed between growth rate and the water-  
406 alkenone hydrogen isotope fractionation in the coccolithophores *Emiliana huxleyi* and  
407 *Gephyrocapsa oceanica* (Schouten et al., 2006). This observation is similar to that  
408 reported here, although the slope is steeper for *D. alaskensis* G20. Microbial lipids were  
409 recently reported to change their  $\delta D_{lipid}$  with growth phase (Heinzelmann et al., 2015),

410 although this effect was relatively minor. Algal lipids have been reported to modulate  
411  $\delta D_{\text{lipid}}$  as a function of physiological state (Romero-Viana et al., 2013). Each of these  
412 relationships could be conceivably related to changes in the turnover rate or ratios of  
413 intracellular metabolites, but specific metabolomics data elucidating these relationships  
414 has yet to be produced.

415

416 Fermentation of pyruvate by *D. alaskensis* G20 likely involves the reduction of pyruvate  
417 with NADH by malic enzyme (ME; Dde\_1253) to malate (Meyer et al., 2014), which is  
418 then dehydrated by fumarase to fumarate, and then reduced to succinate. The oxidative  
419 part of this fermentation involves the transformation of pyruvate to acetate, which  
420 reduces ferredoxin. Reduced ferredoxin is recycled via flavin-based electron bifurcation,  
421 catalyzed by Hdr-Flox-1 (Meyer et al., 2014), but may also interact with NfnAB in the  
422 same way as during pyruvate respiration, in an electron confurcation reaction involving  
423 NADH, producing NADPH. Wild type *D. alaskensis* G20 grown by pyruvate  
424 fermentation produced lipids that showed  $\epsilon_{\text{total}}$  comparable to that produced during  
425 pyruvate respiration. However, the *nfn* mutants grown by pyruvate fermentation had  
426 smaller  $\epsilon_{\text{total}}$  than the wild type. If the *nfn* mutation inhibited NADPH formation, this  
427 pattern is opposite of that seen in other experiments, because it results in a smaller  $\epsilon_{\text{total}}$  at  
428 a lower predicted NADPH/NADP ratio. However, the magnitude is small and the  
429 important electron bifurcations in ferredoxin recycling may be complicating this  
430 interpretation. Unlike the result in Meyer et al. (2014), *nfn* mutants in our experiments  
431 did not show a growth defect on pyruvate fermentation. This may in part be related to  
432 partial pressures of  $H_2$  produced by growing strains (not monitored herein).

433

434 Fumarate fermentation in sulfate reducing bacteria is not well studied, but it is likely a  
435 complex metabolism. Wild type *D. alaskensis* G20 has nearly identical growth rates  
436 during fumarate fermentation and respiration. The *nfn* mutants grow more slowly than the  
437 wild type, but show little difference between fumarate fermentation and respiration.  
438 Respiration and fermentation of fumarate, along with respiration of malate, show nearly  
439 identical patterns in growth rate and in  $\epsilon_{\text{total}}$  for each of our three strains (Figure 4). This  
440 suggests an underlying mechanism uniting these growth conditions

441

442 Fatty acid profiles across the three strains and five conditions show some correlations  
443 with the isotope total fractionation (Figure 6). The fractional abundance of branched  
444 chain lipids, particularly anteiso-C17:0, are positively correlated with the fractionation  
445 and negatively correlated with growth rate. Figure 9 shows three ways in which changing  
446  $\delta D$  values of fatty acids could result in a smaller  $\epsilon_{\text{total}}$ . First, the  $\epsilon_{\text{lipid}}$  could be invariant  
447 for each individual lipid, but lipid abundances could change. Second, there could be a  
448 change in the isotopic ordering of lipids, resulting in a net change in  $\epsilon_{\text{total}}$ . Third, there  
449 could be a consistent change in the  $\epsilon_{\text{lipid}}$  of most or all lipids. Data shown in Figures 3 and  
450 5 rule out the first two options, and show that all  $\epsilon_{\text{lipid}}$  change consistently between  
451 conditions. This suggests that the driving mechanism for changing in  $\epsilon_{\text{total}}$  relates to  
452 process relevant to all lipids. Processes related to the production and consumption of  
453 NADPH are consistent with this role.

454

455 By integrating data from all five experimental conditions and three strains, a clear pattern  
456 emerges, showing growth rate may be critical in determining  $\delta D_{\text{lipid}}$  in SRB (Figure 7).  
457 We do not yet have a theoretical prediction for the nature of this relationship, however  
458 the relationship is consistent with a linear, exponential decay, or hyperbolic relationship  
459 between growth rate and isotope fractionation. This pattern is similar, although opposite  
460 in sign, to that seen in sulfur isotope fractionation imposed by SRB during dissimilatory  
461 sulfate reduction (Leavitt et al., 2013; Sim et al., 2013). Models aimed at addressing the  
462 growth rate—fractionation relationship in sulfur isotopes have focused on ratios of  
463 intracellular metabolites and redox state (Bradley et al., 2016; Wing and Halevy, 2014).  
464 Similar controls could be at work in controlling hydrogen isotope fractionation: ratios of  
465 NAD(P)H/NAD(P)<sup>+</sup> and intracellular redox state are related and the partitioning of  
466 hydrogen between these pools could exert a direct effect on  $\delta D_{\text{lipid}}$ . Work to test this  
467 hypothesis, through growth of SRB under conditions of constant rate, are ongoing. If this  
468 hypothesis holds, then  $\epsilon_{\text{total}}$  and  $\delta D_{\text{lipid}}$  of sulfate reducers may be able to provide a critical  
469 constraint on the interpretation of sulfur isotope patterns in natural systems, such as  
470 marine sediments and anoxic water columns. Furthermore, because the *nfnAB* genes are  
471 widely distributed in anaerobes (Figure 8), the role of electron bifurcating  
472 transhydrogenase in influencing sedimentary lipid H-isotopic distributions is potentially  
473 significant. The metabolic role of NfnAB has been investigated in other anaerobes (Lo et  
474 al., 2015), and studies of hydrogen isotope fractionation using these strains may indicate  
475 whether the patterns uncovered here in sulfate reducers are more generally applicable  
476 throughout the microbial domains of life.

477

478

## 479 5. Conclusions

480

481 The magnitude of hydrogen isotope fractionation in *D. alaskensis* G20 is influenced by  
482 the growth substrate, with growth on pyruvate exhibiting a different isotopic phenotype  
483 than growth on other substrates. Wild type and *nfnAB-2* mutants show large differences  
484 in  $\epsilon_{\text{total}}$  under conditions in which NfnAB-2 is predicted to catalyze an electron  
485 bifurcation. This phenotype was observed across the entirety of the *D. alaskensis* G20  
486 fatty acid profile. While  $\epsilon_{\text{total}}$  correlates with modest changes in the fatty acids produced,  
487 it cannot be accounted for by changes in the abundance of individual lipids. These  
488 changes in apparent fractionation indicate a role for NfnAB-2 in determining the  $\delta D_{\text{lipid}}$   
489 for this strain, which could be significant for explaining  $\delta D_{\text{lipid}}$  in other anaerobes due to  
490 the wide phylogenetic distribution of this enzyme. However, this interpretation is  
491 complicated by growth rate differences between the strains. Using the current data, a  
492 relationship in which  $\delta D_{\text{lipid}}$  is entirely explained by growth rate cannot be excluded.  
493 Future work will aim to isolate these variables and further strengthen our understanding  
494 for the roles of growth and metabolic rate as well as electron-bifurcation during H-  
495 isotopic fractionation in environmentally key anaerobic metabolisms.

496

497

498

499

500

501

502

503 **6. Acknowledgements**

504

505 We thank Dr. A. Deutschbauer and Dr. J. Ray (Lawrence Berkeley National Laboratory)  
506 for providing *D. alaskensis* G20 mutant and wildtype strains, Dr. M. Osburn  
507 (Northwestern University) for water H isotope measurements and discussions of our data,  
508 and Dr. M. Leticariu (Southern Illinois University, Carbondale) for external verification  
509 of lab H isotope standards. We also thank undergraduate researchers C. Wallace and L.  
510 Johnson (Washington University in St. Louis, WashU) for laboratory assistance. W.  
511 Leavitt acknowledges Washington University for the Steve Fossett Postdoctoral  
512 Fellowship. T. Flynn acknowledges support from the Subsurface Science Scientific Focus  
513 Area at Argonne National Laboratory supported by the Subsurface Biogeochemical  
514 Research Program, U.S. Department of Energy (DOE) Office of Science, Office of  
515 Biological and Environmental Research, under DOE contract DE-AC02-06CH11357.  
516 This work was funded by NASA Exobiology grant 13-EXO13-0082.

517 **7. References**

518

- 519 Bizouarn, T., Grimley, R. L., Cotton, N. P. J., Stilwell, S. N., Hutton, M., and Jackson, J.  
520 B. (1995). The involvement of NADP(H) binding and release in energy transduction  
521 by proton-translocating nicotinamide nucleotide transhydrogenase from *Escherichia*  
522 *coli*. *BBA - Bioenerg.* 1229, 49–58.
- 523 Bradley, A. S., Leavitt, W. D., Schmidt, M., Knoll, A. H., Girguis, P. R., and Johnston,  
524 D. T. (2016). Patterns of sulfur isotope fractionation during Microbial Sulfate  
525 Reduction. *Geobiology* 14, 91–101.
- 526 Buckel, W., and Thauer, R. K. (2013). Energy conservation via electron bifurcating  
527 ferredoxin reduction and proton/Na<sup>+</sup> translocating ferredoxin oxidation. *Biochim.*  
528 *Biophys. Acta - Bioenerg.* 1827, 94–113.
- 529 Campbell, B. J., Li, C., Sessions, A. L., and Valentine, D. L. (2009). Hydrogen isotopic  
530 fractionation in lipid biosynthesis by H<sub>2</sub>-consuming *Desulfobacterium*  
531 *autotrophicum*. *Geochim. Cosmochim. Acta* 73, 2744–2757.
- 532 Dawson, K. S., Osburn, M. R., Sessions, A. L., and Orphan, V. J. (2015). Metabolic  
533 associations with archaea drive shifts in hydrogen isotope fractionation in sulfate-  
534 reducing bacterial lipids in cocultures and methane seeps. *Geobiology*, n/a–n/a.
- 535 Edgar, R. C. (2004). MUSCLE: Multiple sequence alignment with high accuracy and  
536 high throughput. *Nucleic Acids Res.* 32, 1792–1797.
- 537 Hayes, J. M. (2001). “Fractionation of the isotopes of carbon and hydrogen in  
538 biosynthetic processes,” in *Stable Isotope Geochemistry, Reviews in Mineralogy and*  
539 *Geochemistry*, 225–278.
- 540 Heinzlmann, S. M., Villanueva, L., Sinke-Schoen, D., Sinninghe Damsté, J. S.,  
541 Schouten, S., and van der Meer, M. T. J. (2015). Impact of metabolism and growth  
542 phase on the hydrogen isotopic composition of microbial fatty acids. *Front.*  
543 *Microbiol.* 6, 1–11.
- 544 Jackson, J. B. (2003). Proton translocation by transhydrogenase. *FEBS Lett.* 545, 18–24.
- 545 Jackson, J. B., Peake, S. J., and White, S. a. (1999). Structure and mechanism of proton-  
546 translocating transhydrogenase. *FEBS Lett.* 464, 1–8.
- 547 Kuehl, J. V., Price, M. N., and Ray, J. (2014). Functional Genomics with a  
548 Comprehensive Library of Transposon.
- 549 Larsson, A. (2014). AliView: A fast and lightweight alignment viewer and editor for  
550 large datasets. *Bioinformatics* 30, 3276–3278.
- 551 Leavitt, W. D., Halevy, I., Bradley, A. S., and Johnston, D. T. (2013). Influence of sulfate  
552 reduction rates on the Phanerozoic sulfur isotope record. *Proc. Natl. Acad. Sci. U. S.*  
553 *A.* 110, 11244–9.
- 554 Letunic, I., and Bork, P. (2011). Interactive Tree of Life v2: Online annotation and  
555 display of phylogenetic trees made easy. *Nucleic Acids Res.* 39, 475–478.
- 556 Lo, J., Zheng, T., Olson, D. G., Ruppertsberger, N., Tripathi, S. a., Guss, A. M., et al.  
557 (2015). Deletion of *nfnAB* in *Thermoanaerobacterium saccharolyticum* and its effect  
558 on metabolism. *J. Bacteriol.* 197, JB.00347–15.
- 559 Marti-Renom, M. A., Stuart, A. C., Fiser, A., Sánchez, R., Melo, F., and Sali, A. (2000).  
560 Comparative protein structure modeling of genes and genomes. *Annu Rev Biophys*  
561 *Biomol Struct* 29, 291–325.
- 562 Meyer, B., Kuehl, J. V., Price, M. N., Ray, J., Deutschbauer, A. M., Arkin, A. P., et al.

- 563 (2014). The energy-conserving electron transfer system used by *Desulfovibrio*  
564 *alaskensis* strain G20 during pyruvate fermentation involves reduction of  
565 endogenously formed fumarate and cytoplasmic and membrane-bound complexes,  
566 Hdr-Flox and Rnf. *Environ. Microbiol.* 16, 3463–3486.
- 567 Osburn, M. R. (2013). Isotopic proxies for microbial and environmental change: insights  
568 from hydrogen isotopes and the Ediacaran Khufai Formation. PhD Dissertation.  
569 California Institute of Technology.
- 570 Overbeek, R., Olson, R., Pusch, G. D., Olsen, G. J., Davis, J. J., Disz, T., et al. (2014).  
571 The SEED and the Rapid Annotation of microbial genomes using Subsystems  
572 Technology (RAST). *Nucleic Acids Res.* 42, 1–9.
- 573 Pearson, A. (2014). “Lipidomics for Geochemistry,” in *Treatise on Geochemistry:*  
574 *Second Edition*, eds. H. D. Holland and K. K. Turekian (Oxford, United Kingdom:  
575 Elsevier), 291–336.
- 576 Pereira, I. A. C., Ramos, A. R., Grein, F., Marques, M. C., da Silva, S. M., and  
577 Venceslau, S. S. (2011). A comparative genomic analysis of energy metabolism in  
578 sulfate reducing bacteria and archaea. *Front. Microbiol.* 2, 69.
- 579 Polissar, P. J., and D’Andrea, W. J. (2014). Uncertainty in paleohydrologic  
580 reconstructions from molecular  $\delta D$  values. *Geochim. Cosmochim. Acta* 129, 146–  
581 156.
- 582 Price, M. N., Ray, J., Wetmore, K. M., Kuehl, J. V., Bauer, S., Deutschbauer, A. M., et al.  
583 (2014). The genetic basis of energy conservation in the sulfate-reducing bacterium  
584 *Desulfovibrio alaskensis* G20. *Front. Microbiol.* 5, 577.
- 585 Qi, H., and Coplen, T. B. (2011). Investigation of preparation techniques for  $\delta 2H$  analysis  
586 of keratin materials and a proposed analytical protocol. *Rapid Commun. Mass*  
587 *Spectrom.* 25, 2209–2222. doi:10.1002/rcm.5095.
- 588 Rabus, R., Hansen, T. A., and Widdel, F. (2006). *Dissimilatory sulfate- and sulfur-*  
589 *reducing prokaryotes.*
- 590 Rabus, R., Venceslau, S. S., Wöhlbrand, L., Voordouw, G., Wall, J. D., and Pereira, I. A.  
591 C. (2015). *A Post-Genomic View of the Ecophysiology, Catabolism and*  
592 *Biotechnological Relevance of Sulphate-Reducing Prokaryotes.*
- 593 RCoreTeam (2015). R: A language and environment for statistical computing. 3464.
- 594 Rodriguez-Ruiz, J., Belarbi, E., S, L. G., and Diego, L. (1998). Rapid simultaneous lipid  
595 extraction and transesterification for fatty acid analyses. 12, 689–691.
- 596 Romero-Viana, L., Kienel, U., Wilkes, H., and Sachse, D. (2013). Growth-dependent  
597 hydrogen isotopic fractionation of algal lipid biomarkers in hypersaline Isabel Lake  
598 (Mexico). *Geochim. Cosmochim. Acta* 106, 490–500.
- 599 Saito, K., Kawaguchi, A., Okuda, S., Seyama, Y., and Yamakawa, T. (1980).  
600 Incorporation of hydrogen atoms from deuterated water and stereospecifically  
601 deuterium-labeled nicotinamide nucleotides into fatty acids with the *Escherichia coli*  
602 fatty acid synthetase system. *Biochim. Biophys. Acta* 618, 202–213.
- 603 Sauer, P. E., Eglinton, T. I., Hayes, J. M., Schimmelmann, A., and Sessions, A. L. (2001).  
604 Compound-specific D/H ratios of lipid biomarkers from sediments as a proxy for  
605 environmental and climatic conditions. *Geochim. Cosmochim. Acta* 65, 213–222.
- 606 Sauer, U., Canonaco, F., Heri, S., Perrenoud, A., and Fischer, E. (2004). The soluble and  
607 membrane-bound transhydrogenases UdhA and PntAB have divergent functions in  
608 NADPH metabolism of *Escherichia coli*. *J. Biol. Chem.* 279, 6613–9.

- 609 Schouten, S., Ossebaar, J., Schreiber, K., Kienhui, s M. V. M., Langer, G., Benthien, A.,  
610 et al. (2006). The effect of temperature, salinity and growth rate on the stable  
611 hydrogen isotopic composition of long chain alkenones produced by *Emiliana*  
612 *huxleyi* and *Gephyrocapsa oceanica*. *Biogeosciences* 3, 113–119.
- 613 Sessions, A. L., and Hayes, J. M. (2005). Calculation of hydrogen isotopic fractionations  
614 in biogeochemical systems. *Geochim. Cosmochim. Acta* 69, 593–597.
- 615 Silvestro, D., and Michalak, I. (2012). RaxmlGUI: A graphical front-end for RAxML.  
616 *Org. Divers. Evol.* 12, 335–337.
- 617 Sim, M. S., Wang, D. T., Zane, G. M., Wall, J. D., Bosak, T., and Ono, S. (2013).  
618 Fractionation of sulfur isotopes by *Desulfovibrio vulgaris* mutants lacking  
619 hydrogenases or type I tetraheme cytochrome c 3. *Front. Microbiol.* 4, 171.
- 620 Stamatakis, A. (2006). RAxML-VI-HPC: Maximum likelihood-based phylogenetic  
621 analyses with thousands of taxa and mixed models. *Bioinformatics* 22, 2688–2690.
- 622 The UniProt Consortium (2014). UniProt: a hub for protein information. *Nucleic Acids*  
623 *Res.* 43, D204–12.
- 624 Venning, J. D., Bizouarn, T., Cotton, N. P. J., Quirk, P. G., and Jackson, J. B. (1998).  
625 Stopped-flow kinetics of hydride transfer between nucleotides by recombinant  
626 domains of proton-translocating transhydrogenase. *Eur. J. Biochem.* 257, 202–209.
- 627 Wang, S., Huang, H., Kahnt, J., Mueller, A. P., Köpke, M., and Thauer, R. K. (2013a).  
628 NADP-specific electron-bifurcating [FeFe]-hydrogenase in a functional complex  
629 with formate dehydrogenase in *Clostridium autoethanogenum* grown on CO. *J.*  
630 *Bacteriol.* 195, 4373–86.
- 631 Wang, S., Huang, H., Kahnt, J., and Thauer, R. K. (2013b). A reversible electron-  
632 bifurcating ferredoxin- and NAD-Dependent [FeFe]-Hydrogenase (HydABC) in  
633 *Moorella thermoacetica*. *J. Bacteriol.* 195, 1267–1275.
- 634 Wing, B. A., and Halevy, I. (2014). Intracellular metabolite levels shape sulfur isotope  
635 fractionation during microbial sulfate respiration. *Proc. Natl. Acad. Sci.* 111, 18116–  
636 18125.
- 637 Zhang, X., Gillespie, A. L., Sessions, A. L., Zhang X, Gillespie AL, and Sessions AL  
638 (2009). Large D/H variations in bacterial lipids reflect central metabolic pathways.  
639 *Proc. Natl. Acad. Sci. U. S. A.* 106, 12580–6.
- 640  
641

642  
643

TABLE(s)

| Average growth rates     |               |                                       |
|--------------------------|---------------|---------------------------------------|
| Treatment                | Strain        | $\mu_{avg} \pm 1\sigma$<br>(per hour) |
| pyruvate +<br>sulfate    | wildtype      | 0.154 ± 0.029                         |
|                          | <i>nfnA-2</i> | 0.172 ± 0.029                         |
|                          | <i>nfnB-2</i> | 0.168 ± 0.035                         |
| malate +<br>sulfate      | wildtype      | 0.067 ± 0.007                         |
|                          | <i>nfnA-2</i> | 0.014 ± 0.006                         |
|                          | <i>nfnB-2</i> | 0.015 ± 0.004                         |
| fumarate +<br>sulfate    | wildtype      | 0.085 ± 0.012                         |
|                          | <i>nfnA-2</i> | 0.011 ± 0.002                         |
|                          | <i>nfnB-2</i> | 0.007 ± 0.006                         |
| fumarate<br>fermentation | wildtype      | 0.057 ± 0.007                         |
|                          | <i>nfnA-2</i> | 0.010 ± 0.002                         |
|                          | <i>nfnB-2</i> | 0.015 ± 0.004                         |
| pyruvate<br>fermentation | wildtype      | 0.131 ± 0.007                         |
|                          | <i>nfnA-2</i> | 0.120 ± 0.001                         |
|                          | <i>nfnB-2</i> | 0.149 ± 0.012                         |

644  
645  
646  
647  
648  
649  
650  
651

**Table 1:** Growth rates of *D. alaskensis* G20 wild type and *nfnAB-2* transhydrogenase mutants on different substrates during sulfate respiration or substrate fermentation. Rates were calculated as described in the methods with associated errors. The range in rate is larger for experiments that exhibited bi-phasic (diauxic) growth patterns (e.g. fumarate + sulfate), as is apparent from the growth curves (Fig. 2).



652  
653  
654

FIGUREs

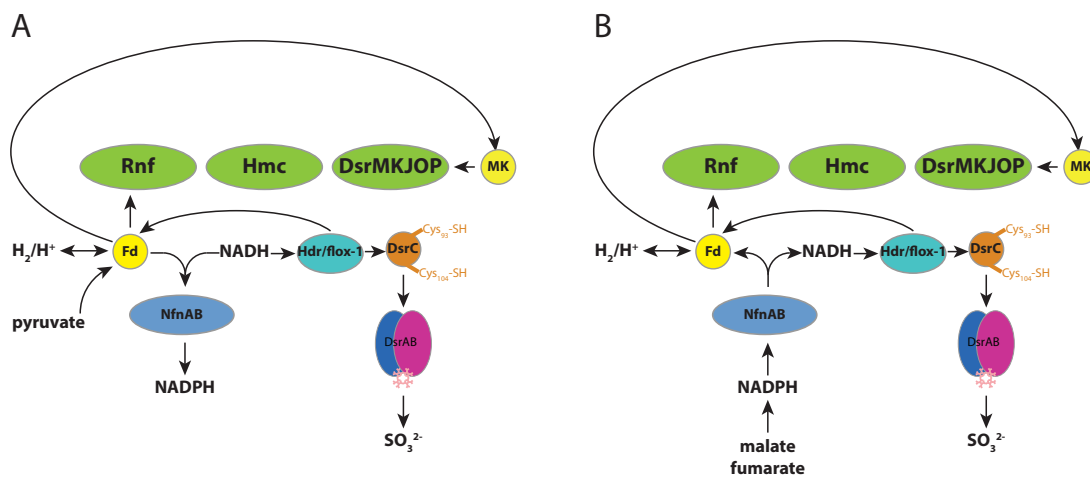

655  
656  
657  
658  
659  
660  
661  
662  
663  
664

**Figure 1.** (A). A schematic pathway of electron flow during pyruvate respiration or fermentation in WT *D. alaskensis* G20. Electrons are transferred from pyruvate through ferredoxin and NADPH, and NfnAB catalyzes electron confurcation, producing NADPH. Mutation of NfnAB is predicted to result in deficiency of NADPH (B). Electron flow during fumarate and malate respiration or fumarate fermentation. NfnAB catalyzes electron bifurcation, such that the mutant strains are predicted to have excess NADPH.

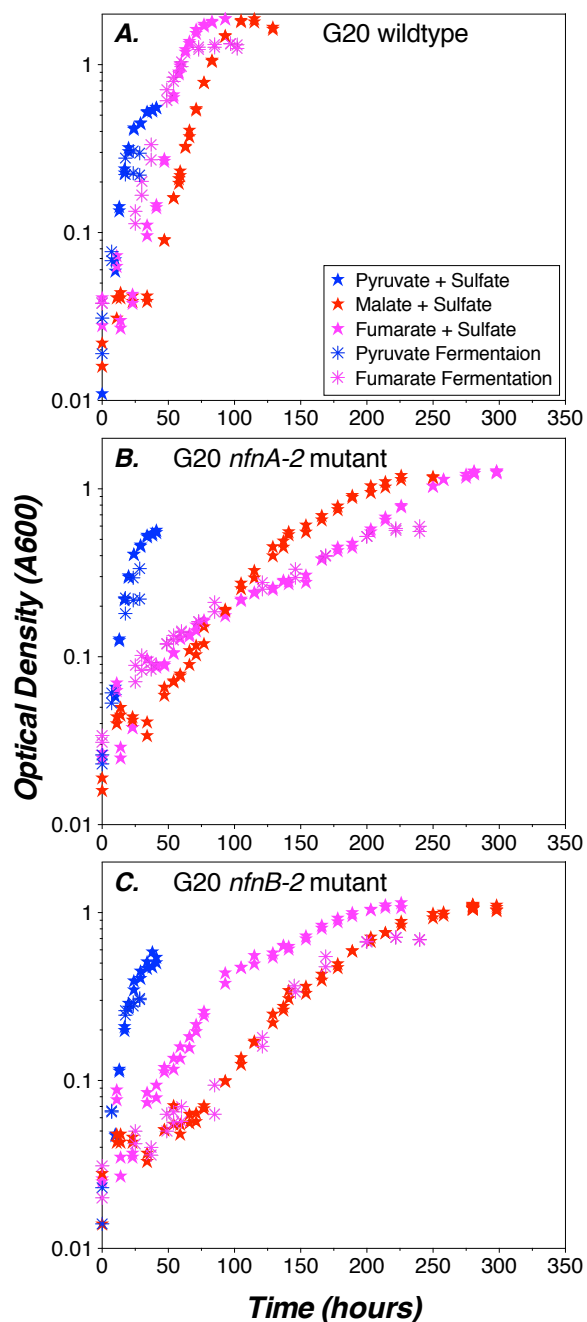

665  
666  
667  
668  
669  
670  
671

**Figure 2.** Growth curves for *D. alaskensis* G20 wildtype and transhydrogenase mutants. (A) Wildtype, (B) *nfnA-2* transposon mutant, and (C) *nfnB-2* transposon mutant, each under all 5-condition sets tested (denoted in the legends). Each symbol represents the average of biological duplicate 50mL cultures. Error bars are smaller than the symbols in all cases. Samples for lipid and isotopic analysis were extracted after the final time-point indicated on this plot, all in early stationary phase.

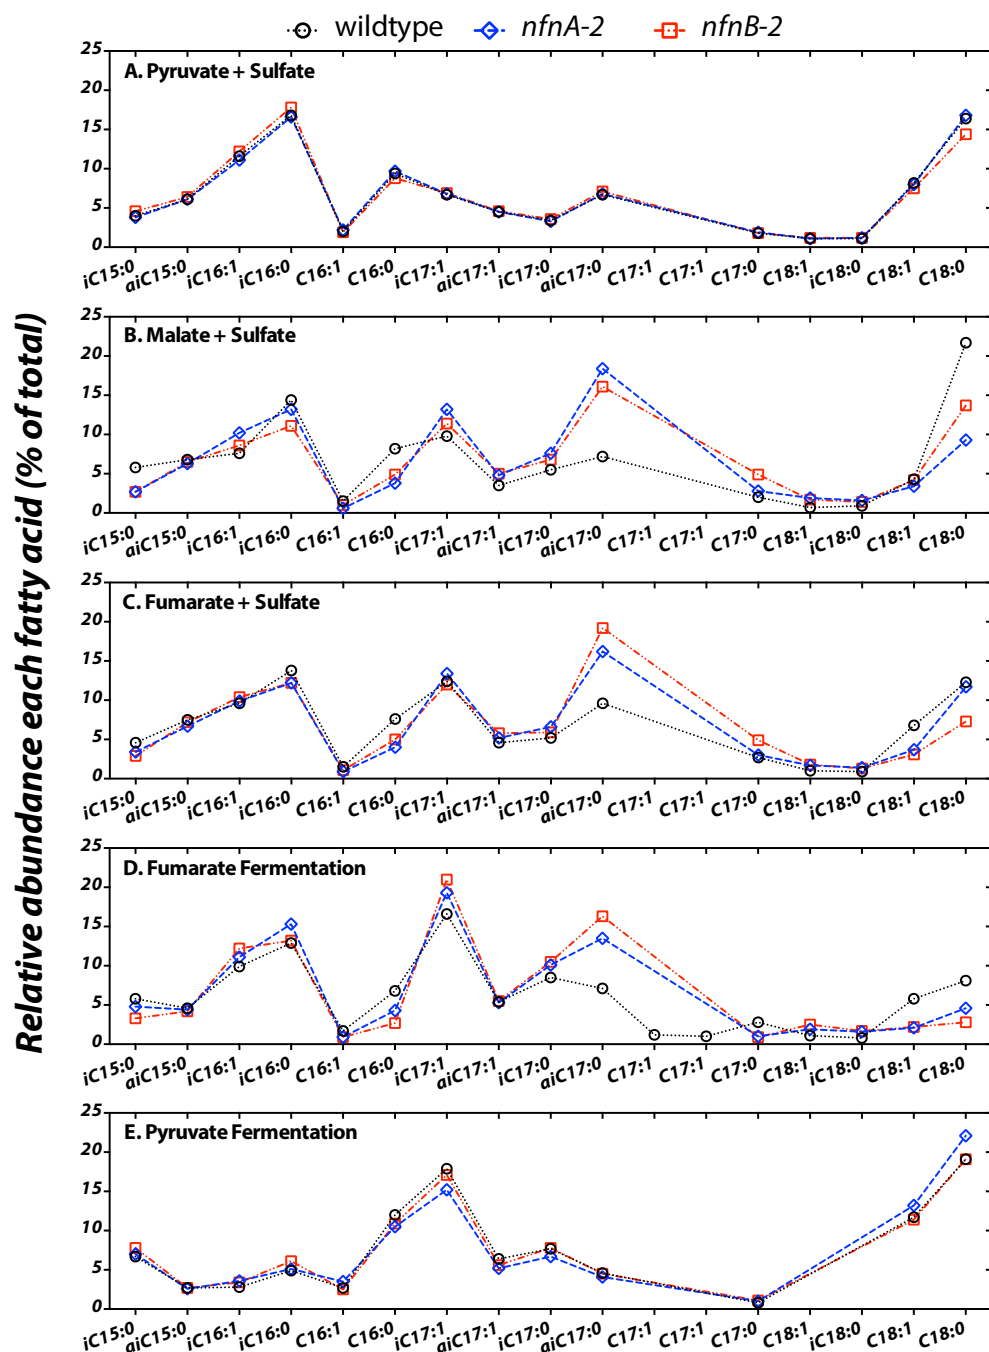

672  
673  
674  
675  
676  
677  
678  
679  
680

**Figure 3.** The relative abundance of each fatty acid (% of total) from each strain under the five different growth condition tested (A to E). Sample key: wild type (black circles, dotted lines) or *nfnAB-2* transhydrogenase insertion-deletion mutants, *nfnA-2* (blue diamonds, dashed lines) and *nfnB-2* (red squares, dash-dotted lines). Each symbol is the average of biological replicates for each strain given that condition set, and the standard error of individual fatty acid quantifications is <0.5% between biological replicates (error bar significantly smaller than the symbols).

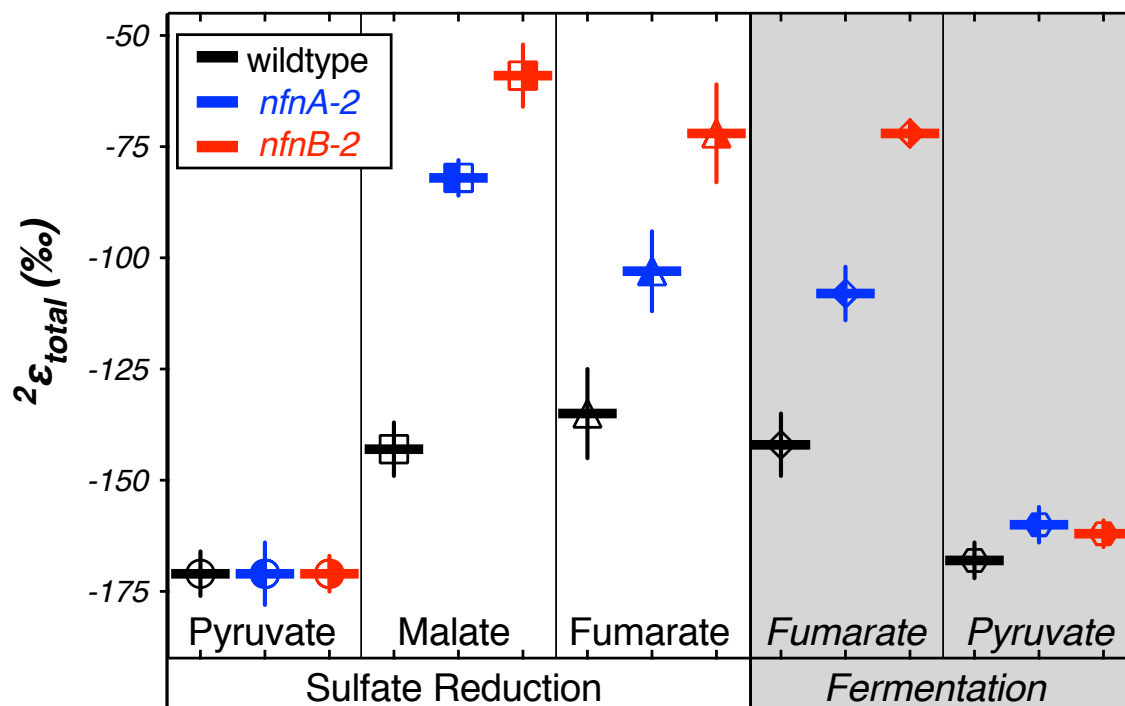

681  
682  
683  
684  
685  
686  
687

**Figure 4.** Hydrogen isotope fractionation between media water and the mass-weighted lipid pool for each treatment. The values plotted are the average of biological replicates and weighted average of all individually measured compounds. Vertical bars are standard errors on the mean (SEM).

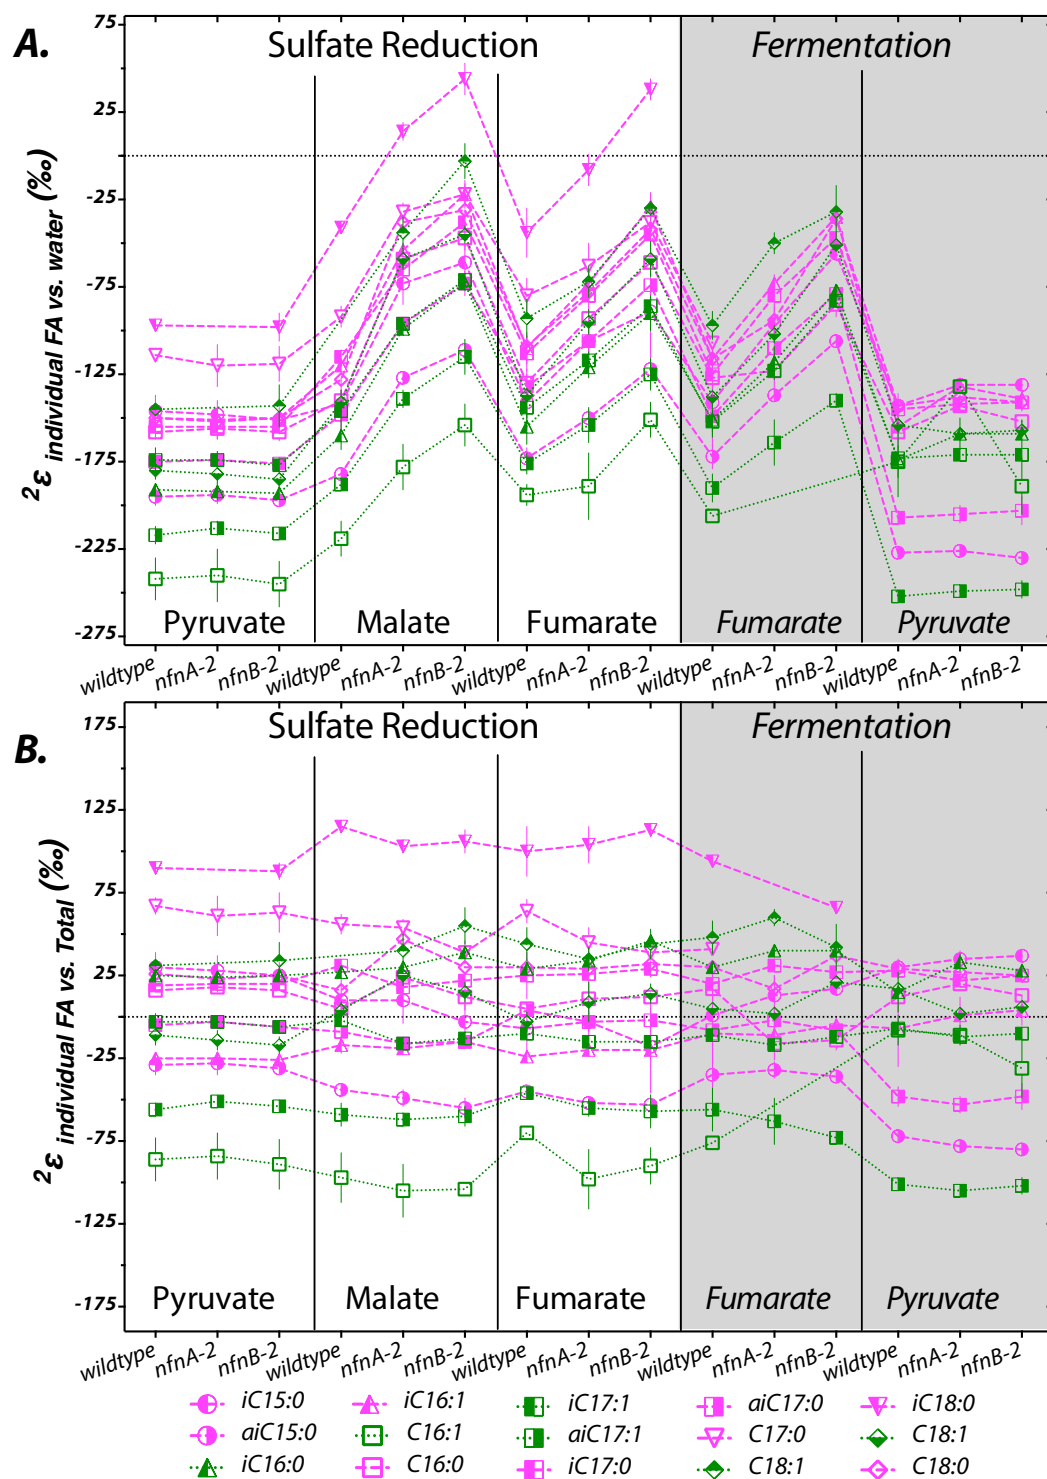

688  
689  
690  
691  
692  
693

**Figure 5.** (A) Hydrogen isotope values for individual fatty acids relative to the medium water. (B) Deviation of individual fatty acid H-isotopic composition relative to the weighted mean of each individual experiment. Each symbol represents the mean of biological replicates (N = 2, and technical replication  $n_{avg.} = 3$ , range 1 to 6), with SEM.

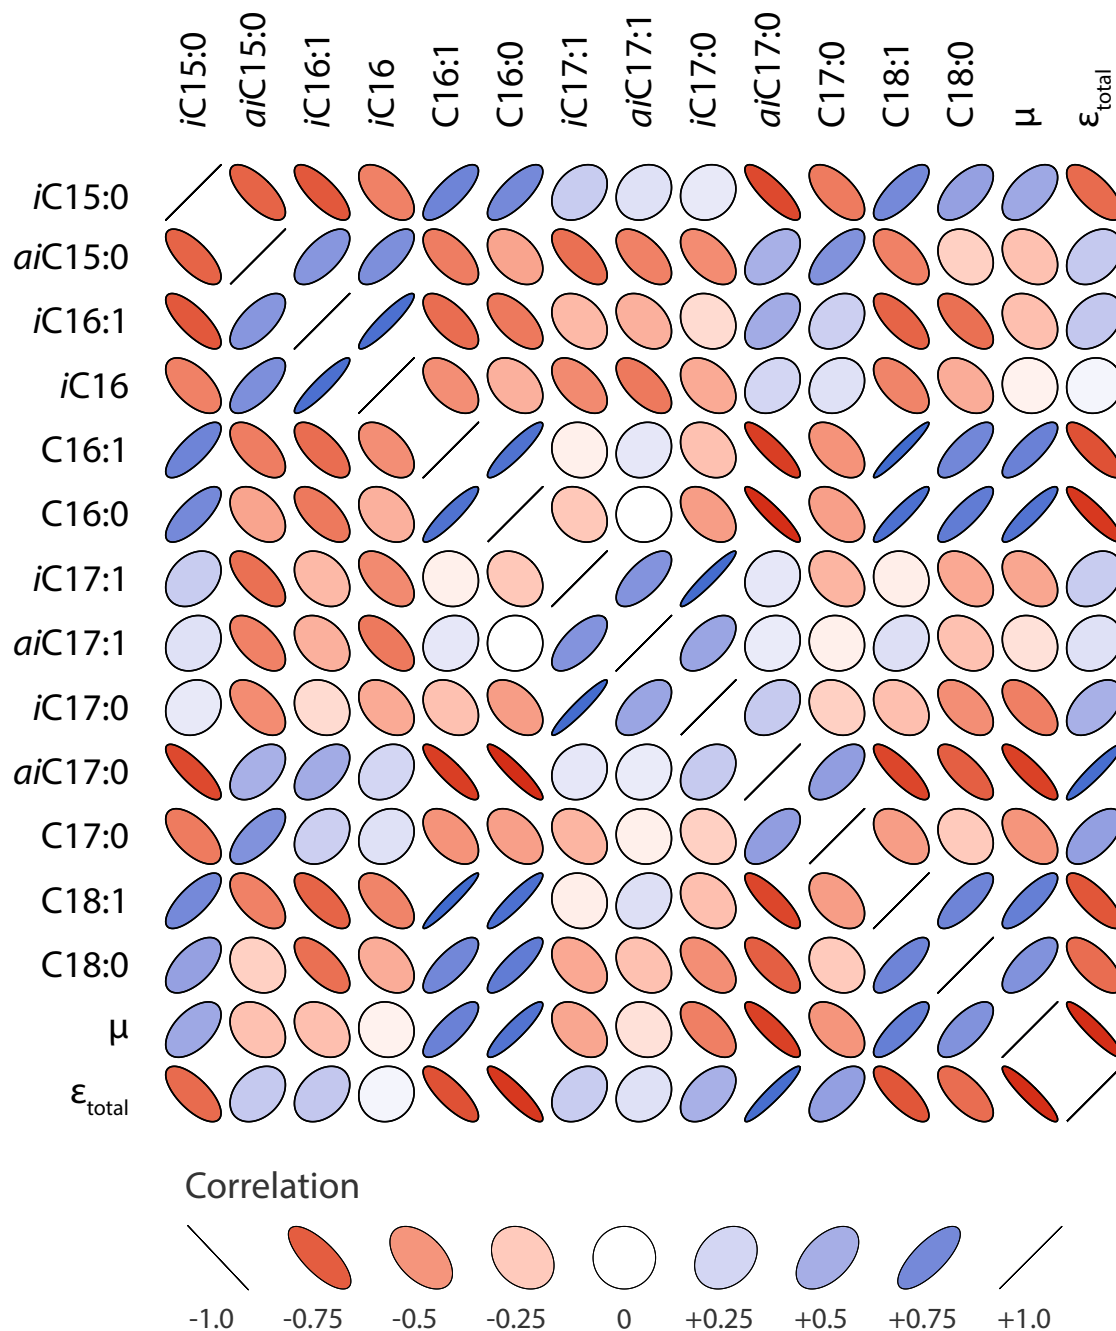

694

696

697

698

699

700

701

**Figure 6.** Representation of Pearson correlation indices for each pair of variables. Width of ellipses indicates the strength of the correlation, with narrow ellipses indicating a strong correlation and circles indicating no correlation. Darker blues are stronger positive correlations, darker reds are stronger negative correlations, with white indicating no correlation.

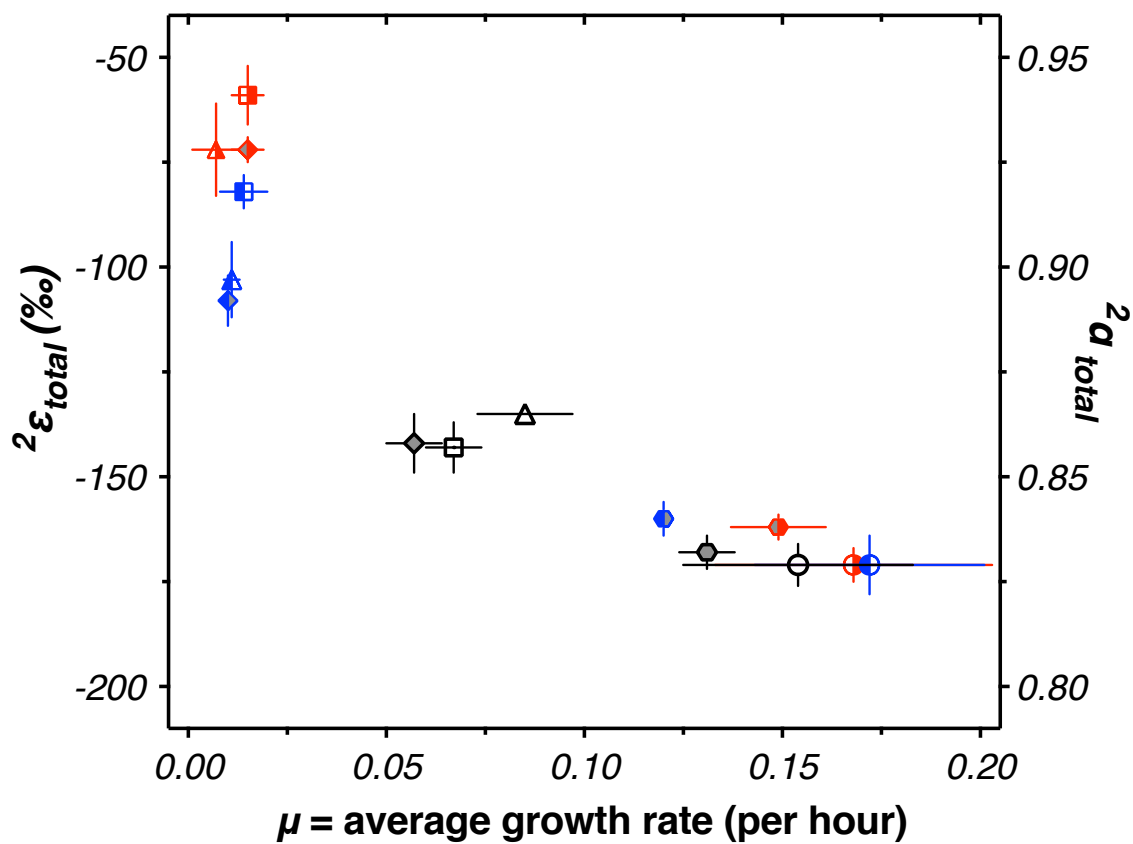

703  
704  
705  
706

**Figure 7.** Mean growth rate versus the mass weighted mean H isotope fractionation for all experiments (the values from Table 1 and Figure 4, respectively).

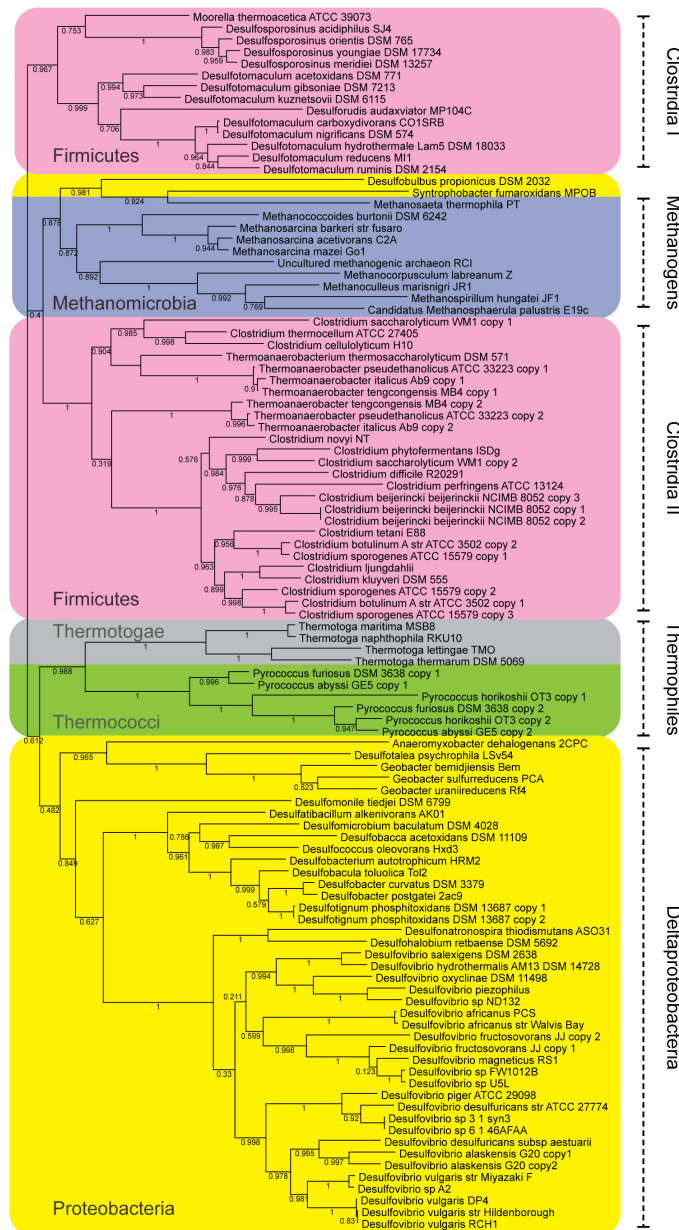

708  
709  
710  
711  
712

**Figure 8.** Maximum likelihood phylogenetic tree of NfnAB using amino acid sequences taken from the sequenced genomes of known anaerobes. Each branch is colored by Phylum. Bootstrap values (out of 100) are shown at each branch point.



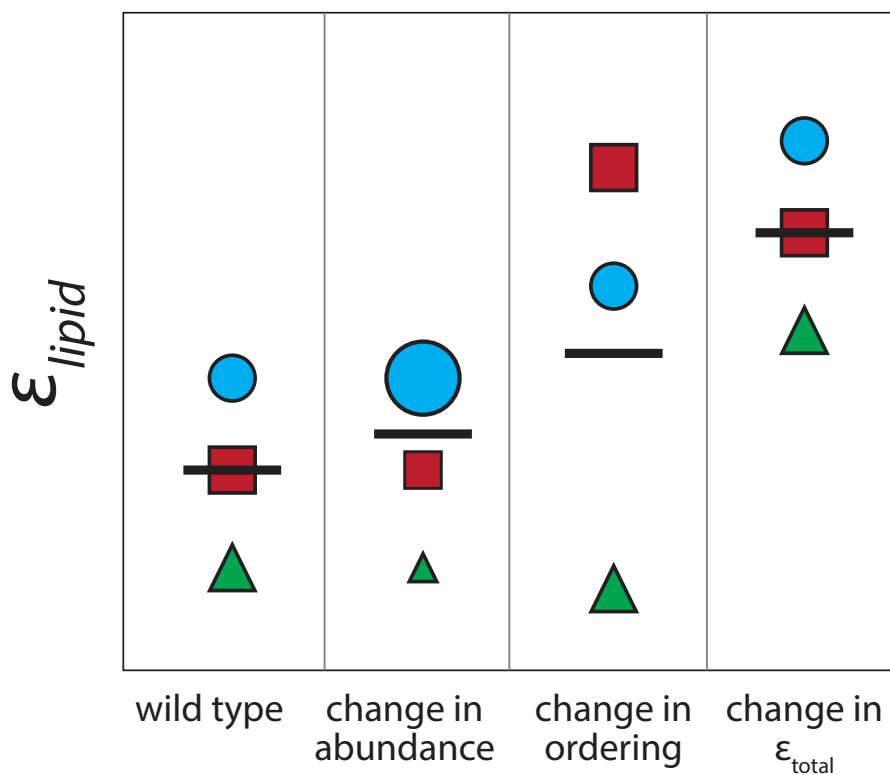

713  
714  
715  
716  
717  
718  
719  
720

**Figure 9.** Potential mechanisms for changing the weighted average of D/H in the lipid pool. Colored symbols represent individual lipids, horizontal bar represents weighted average ( $\epsilon_{\text{total}}$ ). Change in abundance: increased abundance of lipids with various  $\epsilon_{\text{lipid}}$ . Change in ordering: changes in  $\epsilon_{\text{lipid}}$  that differed among lipids. Change in  $\epsilon_{\text{total}}$ : a uniform change to the  $\epsilon_{\text{lipid}}$  of every lipid.

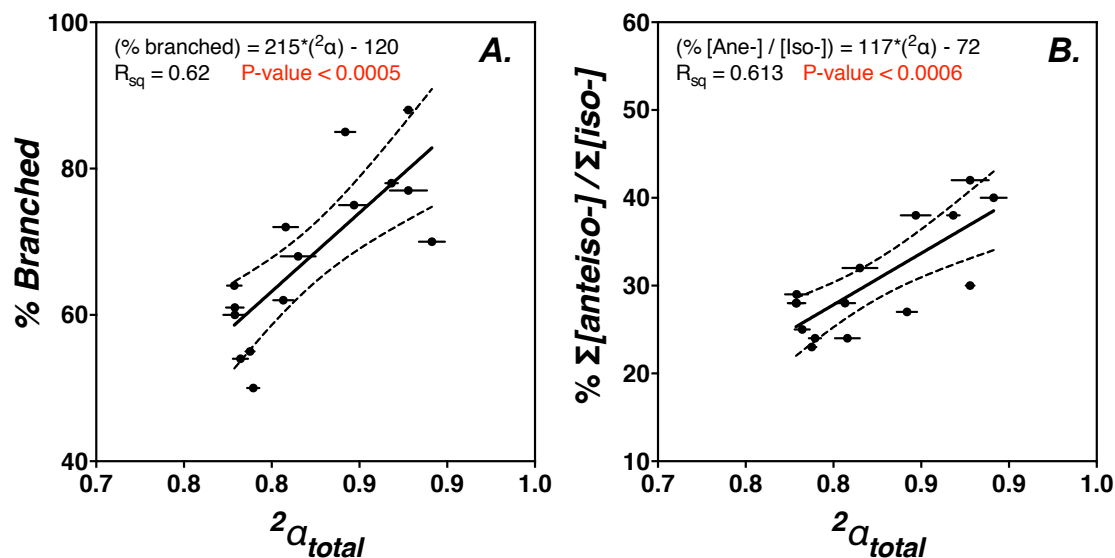

721

722

723 **Figure S1.** The (A) abundance of branched fatty acids or (B) proportion of anteiso-/iso-

724 branched fatty acids, each relative to  $\epsilon_{total}$  for all the conditions tested. The linear

725 regression (solid line) for each is significant ( $P\text{-value} < 0.005$ ), with the 95% confidence

intervals plotted as dashed lines.

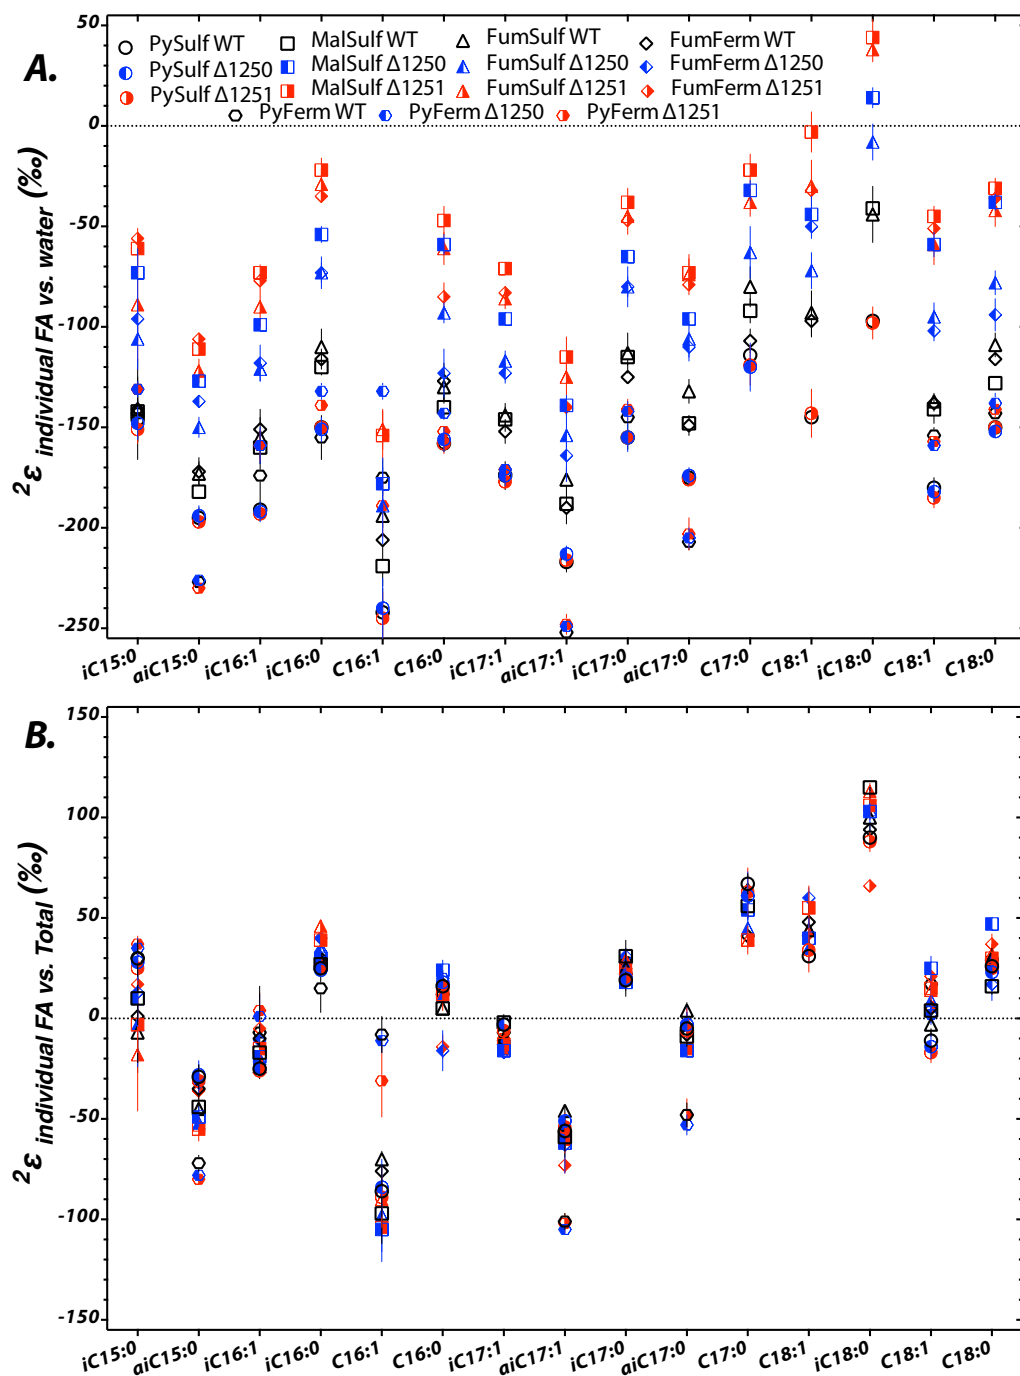

726  
727  
728  
729

**Figure S2.** The same values as in Figure 5, here plotted by fatty acid ID (on the X-axis), and coded by experimental combination (see legend).
